# Supplementary material for: Nuclear-Targeting Delivery of CRISPRa System for Upregulation ofβ-Defensin against Virus Infection by Dexamethasone and Phenylalanine Dual-Modified Dendrimer
Source: Hindawi journal article supplement (doi:10.1155/2020/6582825), 2020-05-04
Supplement: f1 [file 6582825.f1.docx]

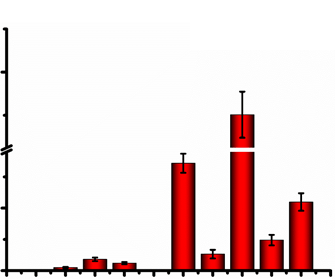

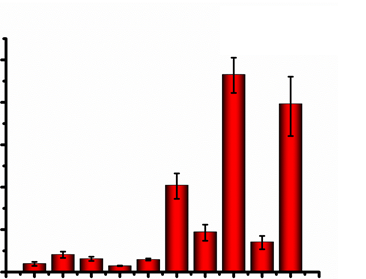
**Supplement**

**Relative HBD1 mRNA expression**

**Relative HBD1 mRNA expression**

**
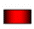

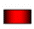
**

25

10000

Lipo (A549 cells)

Lipo (293T cells)

20

15

5

10

2000

0

Control

sg9

sg8

sg7

sg6

sg5

sg4

sg3

sg2

sg1

0

**Relative HBD1 mRNA expression**

Control

sg9

sg8

sg7

sg6

sg5

sg4

sg3

sg2

sg1


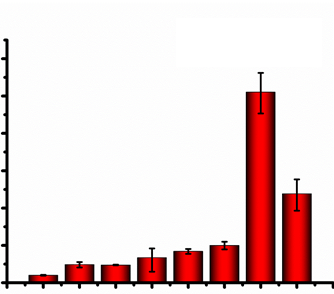

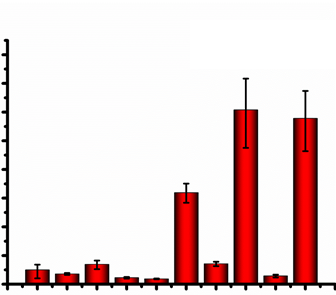

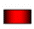

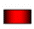


0

2

4

6

8

10

12

14

16

0

5

10

15

20

25

30

Lipo (N2a cells)

Lipo (16HBE cells)

**Relative MBD4 mRNA expression**

Control

sg1+sg2+sg3+sg4+sg5

sg2+sg3

sg5

sg4

sg3

sg2

sg1

Control

sg9

sg8

sg7

sg6

sg5

sg4

sg3

sg2

sg1

**Figure S1**. Relative mRNA expression in the 293T, A549, 16HBE, and N2a cells receiving dCas9 and sgRNA plasmids delivered with Lipofectamine 2000.

**Table S1.** Sequences of sgRNA and primer sequences

|  |  |  | **Sequences** |
| --- | --- | --- | --- |
| **Target sequences** | **MBD4** | **sgRNA1-F** | **TCAGTGCCTTATATAGTGCC** |
| **sgRNA2-F** | **ACACTGAATGTGCTCTCAAA** |
| **sgRNA3-F** | **CTCTTGGTGAGCAGTGCAGG** |
| **sgRNA4-F** | **CCAATGCAGGGGGCAGCACC** |
| **sgRNA5-F** | **TACTGGGGTTCTAGTCAGTG** |
| **HBD1** | **sgRNA1-F** | **TCCACCCTACACTGTCACGG** |
| **sgRNA2-F** | **GTCCCAGGAACACGTCTAGT** |
| **sgRNA3-F** | **TCGCTAACAGCACCCCAATC** |
| **sgRNA4-F** | **CGACTCTCCAAGTATCCCTC** |
| **sgRNA5-F** | **GGGGCCGCTCGGCTCTAAGC** |
| **sgRNA6-F** | **AACACCAGCTTAGAGCCGAG** |
| **sgRNA7-F** | **GGATTGCACAACCTCGTCGA** |
| **sgRNA8-F** | **TCCCTTCAGTTCCGTCGACG** |
| **sgRNA9-F** | **AACTTCTAATCGCTAACCCC** |
| **Real-Time PCR Primers** | **MBD4** | **MBD4-F** | **GGCCTGCCTCTTCTGTGTAG** |
| **MBD4-R** | **AGGAGTGTGTTCCAGGGATG** |
| **HBD1** | **HBD1-F** | **TGAGATGGCCTCAGGTGGTA** |
| **HBD1-R** | **CTTGCAGCACTTGGCCTTC** |
| **M-β-actin** | **M-β-actin-F** | **TGGCTCCTAGCACCATGAAG** |
| **M-β-actin-R** | **CCTGCTTGCTGATCCACATC** |
| **H-β-actin** | **H-β-actin-F** | **GTACGCCAACACAGTGCTGTCT** |
| **H-β-actin-R** | **CCTGCTTGCTGATCCACATC** |
